# Supplementary material for: Impact of Invasive Fungal Diseases on Survival under Veno-Venous Extracorporeal Membrane Oxygenation for ARDS
Source: J Clin Med. 2022 Mar 31;11(7):1940. doi: 10.3390/jcm11071940 (PMC8999842; doi:10.3390/jcm11071940)
Supplement: Supplementary file 1 [file jcm-11-01940-s001.zip › Table S1.pdf]

| Invasive Fungal Disease:              | Yes<br>N (%) | No<br>N (%) |
|---------------------------------------|--------------|-------------|
| Charlson Comorbidity Index Items      |              |             |
| - Myocardial Infarction               | 1 (4.5)      | 2 (9.1)     |
| - Congestive Heart Failure            | 2 (9.1)      | 1 (4.5)     |
| - Peripheral Vascular Disease         | 2 (9.1)      | 1 (4.5)     |
| - Cerebrovascular Disease             | 3 (13.6)     | 1 (4.5)     |
| - Dementia                            | 0 (0)        | 0 (0)       |
| - Chronic Pulmonary Disease           | 4 (18.2)     | 5 (22.7)    |
| - Connective Tissue Disease           | 0 (0)        | 0 (0)       |
| - Peptic Ulcer Disease                | 0 (0)        | 1 (4.5)     |
| - Mild Liver Disease                  | 1 (4.5)      | 1 (4.5)     |
| - Diabetes (without end organ damage) | 4 (18.2)     | 2 (9.1)     |
| - Hemiplegia                          | 0 (0)        | 0 (0)       |
| - Moderate or Severe Renal Disease    | 1 (4.5)      | 0 (0)       |
| - Diabetes (with end organ damage)    | 1 (4.5)      | 1 (4.5)     |
| - Any Tumor                           | 2 (9.1)      | 2 (9.1)     |
| - Leukemia                            | 0 (0)        | 0 (0)       |
| - Lymphoma                            | 0 (0)        | 0 (0)       |
| - Moderate of Severe Liver Disease    | 0 (0)        | 0 (0)       |
| - Metastatic Solid Tumor              | 0 (0)        | 0 (0)       |
| - AIDS                                | 0 (0)        | 0 (0)       |
| Surgery *                             | 4 (18.2)     | 5 (22.7)    |
| CRRT *                                | 14 (63.6)    | 15 (68.2)   |
| Immunosuppression **                  | 4 (18.2)     | 6 (27.3)    |

**Table S1.** Comorbidities and potentially predisposing factors for invasive fungal disease (IFD) in patient cohorts. CRRT: Continuous Renal Replacement Therapy. \* During current hospitalization, before or at time of IFD diagnosis. \*\* As defined in text. There were no statistically significant differences between patients with IFD and without IFD.
