# Supplementary material for: Impact of Invasive Fungal Diseases on Survival under Veno-Venous Extracorporeal Membrane Oxygenation for ARDS
Source: J Clin Med. 2022 Mar 31;11(7):1940. doi: 10.3390/jcm11071940 (PMC8999842; doi:10.3390/jcm11071940)
Supplement: Supplementary file 1 [file jcm-11-01940-s001.zip › Table S2.pdf]

| Pathogen        | Location | 1st treatment          | 2nd treatment              | Sensible to treatment | Time (d) between |               |                 |                    |                                |                 | Death | Treatment at time of death/discharge |
|-----------------|----------|------------------------|----------------------------|-----------------------|------------------|---------------|-----------------|--------------------|--------------------------------|-----------------|-------|--------------------------------------|
|                 |          |                        |                            |                       | ECMO - IFD       | ECMO - IFDval | IFD - treatment | IFDval - treatment | clearance - end of antifungals | IFD - clearance |       |                                      |
| C. albicans     | Blood    | Voriconazole           |                            | Yes                   | 0                | 6             | 1               | -5                 | 17                             | 7               | Yes   | No                                   |
| C. albicans     | Blood    | Fluconazole            | Caspofungin                | Yes                   | 18               | 25            | 1               | -6                 | n/a                            | 4               | Yes   | Yes                                  |
| C. glabrata     | Blood    | Fluconazole            | Anidulafungin              | unknown               | 12               | 16            | -10             | -14                | n/a                            | never           | Yes   | Yes                                  |
| C. albicans     | Blood    | Voriconazole           | Anidulafungin, Fluconazole | Yes                   | 6                | 11            | 0               | -5                 | n/a                            | 1               | No    | Yes                                  |
| C. krusei       | Blood    | Caspofungin            |                            | Yes                   | 14               | 17            | 0               | -3                 | n/a                            | never           | Yes   | Yes                                  |
| C. albicans     | Blood    | Caspofungin            |                            | Yes                   | 29               | 34            | 2               | -3                 | 17                             | 5               | Yes#  | No                                   |
| C. albicans     | Blood    | Caspofungin            | Fluconazole                | Yes                   | 0                | 5             | 2               | -3                 | 15                             | 3               | Yes#  | Yes                                  |
| C. albicans     | Blood    | Caspofungin            | Fluconazole                | Yes                   | 0                | 7             | 2               | -5                 | 14                             | 5               | No    | No                                   |
| C. albicans     | Blood    | Caspofungin            | Anidulafungin              | Yes                   | 23               | 27            | -1              | -5                 | n/a                            | 2               | Yes   | Yes                                  |
| C. albicans     | Blood    | Caspofungin            | Fluconazole                | Yes                   | 0                | 4             | 1               | -3                 | 13                             | 4               | No    | No                                   |
| C. albicans     | Blood    | Voriconazole           | Caspofungin                | Yes                   | 0                | 4             | 2               | -2                 | 14                             | 4               | No    | No                                   |
| C. albicans     | Blood    | Caspofungin            | Fluconazole                | Yes                   | 14               | 18            | 2               | -2                 | n/a                            | 3               | Yes   | Yes                                  |
| C. albicans     | Blood    | n/a *                  |                            | n/a *                 | 11               | 16            | n/a *           | n/a *              | n/a *                          | never           | Yes * | n/a *                                |
| C. albicans     | Blood    | Caspofungin            |                            | Yes                   | 8                | 14            | 2               | -4                 | n/a                            | never           | Yes   | Yes                                  |
| C. albicans     | Blood    | Voriconazole           | Fluconazole                | Yes                   | 41               | 45            | 2               | -2                 | n/a                            | never           | Yes # | Yes                                  |
| C. albicans     | Blood    | Voriconazole           | Anidulafungin              | Yes                   | 0                | 6             | 0               | -6                 | 18                             | 2               | Yes   | No                                   |
| C. albicans     | Blood    | Caspofungin            |                            | Yes                   | 23               | 29            | 2               | -4                 | n/a                            | never           | Yes   | Yes                                  |
| C. kefyr        | Blood    | Caspofungin            | Voriconazole               | Yes                   | 18               | 22            | 1               | -3                 | n/a                            | never           | Yes   | Yes                                  |
| Asp. terreus    | BALF     | Voriconazole           |                            | Yes                   | 3                | 10            | 3               | -4                 | n/a                            | never           | Yes   | Yes                                  |
| C. krusei       | Blood    | Amphotericin B (lipo.) |                            | Yes                   | 13               | 16            | 0               | -3                 | n/a                            | never           | Yes   | Yes                                  |
| C. parapsilosis | Blood    | Caspofungin            |                            | Yes                   | 36               | 42            | 2               | -4                 | n/a                            | 1               | Yes   | Yes                                  |
| Asp. fumigatus  | BALF     | None **                |                            | Yes                   | 12               | 22            | n/a             | n/a                | n/a                            | never           | Yes   | No                                   |

**Table S2.** Diagnosis of invasive fungal disease (IFD) and treatment in patients on ECMO support. Asp.: Aspergillus. BALF: Bronchoalveolar lavage fluid. C.: Candida. IFDval.: Validated fungal culture and resistogram. n/a: not applicable. Lipo.: Liposomal. \* death occurred at time of IFI diagnosis. \*\* Test results became available after patient had deceased. # Weaning of ECMO completed before death
